# Supplementary material for: Boundaries in ground beetle (Coleoptera: Carabidae) and environmental variables at the edges of forest patches with residential developments
Source: PeerJ. 2018 Jan 8;6:e4226. doi: 10.7717/peerj.4226 (PMC5764035; doi:10.7717/peerj.4226)
Supplement: Supplemental Information 3 — Overlap statistics calculated for pairs of environmental and ground beetle variables. Shown for each pair: Oe, the mean minimum Euclidean distance between each environmental candidate boundary element and the closest beetle candidate boundary element (m); Ob, the mean minimum Euclidean distance between each beetle candidate boundary element and the closest environmental candidate boundary element (m); Oeb, the overall mean minimum Euclidean distance between beetle and environmental candidate boundary elements (m); and Os, the number of beetle and environmental candidate boundary elements at the same locations. † Significantly low value (p < 0.10). ∗ Significantly high value (p < 0.10). [file peerj-06-4226-s003.docx]

**Table S8.** Overlap statistics calculated for pairs of environmental and ground beetle variables measured at the rural site at the small spatial scale. Shown for each pair: *Oe*, the mean minimum Euclidean distance between each environmental candidate boundary element and the closest beetle candidate boundary element (m); *Ob*, the mean minimum Euclidean distance between each beetle candidate boundary element and the closest environmental candidate boundary element (m); *Oeb*, the overall mean minimum Euclidean distance between beetle and environmental candidate boundary elements (m); and *Os*, the number of beetle and environmental candidate boundary elements at the same locations. †Significantly low value (*p* < 0.10). *Significantly high value (*p* < 0.10).

| Beetle variable | Temperature | Leaf litter depth | Canopy cover | Forb cover | Grass cover | Vine cover | Rock cover | Coarse woody debris cover | All environmental variables |
| --- | --- | --- | --- | --- | --- | --- | --- | --- | --- |
| Total species evenness | 49,60,55,0† | 31,27,29,3 | 45,61,53,2 | 45,51,48,2 | 35,39,37,3 | 23†,21†,22†,3 | 26,21,24,6 | 21†,22,21†,5 | 35,29*,32,4 |
| Open-habitat species abundance | 19,16†,17†,10* | 37,17,27,6 | 18,13†,15†,11* | 8†,9†,9†,13* | 26,13†,19†,9 | 44*,28,36*,5 | 48*,30,39,6 | 77*,45*,61*,3 | 37,15†,26,9 |
| All species | 24,17†,20†,9 | 37*,18,28,5 | 22,11†,16†,13* | 7†,7†,7†,16* | 28,16†,22,8 | 38*,25,31*,8 | 46*,32,39*,3 | 74*,51*,62*,1† | 43*,19,31*,6 |
| *Amara aenea* | 19,16†,17†,10* | 37,17,27,6 | 18,13†,15†,11* | 8†,9†,9†,13* | 26,13†,19†,9 | 44, *28,36*,5 | 48*,30,39*,6 | 77*,45*,61*,3 | 37,15†,26,9 |
| *Harpalus pensylvanicus* | 13†,16†,15†,9* | 19†,12†,16†,10* | 9†,11†,10†,14* | 18,21†,20†,8 | 20,16†,18†,7 | 48*,31,40*,2 | 27,21,24,8 | 67*,47*,57*,3 | 31,14†,22,10 |
| *Sphaeroderus stenostomus lecontei* | 85*,81*,83*,1† | 55*,28,42*,5 | 85*,90*,87*,0† | 88*,87*,87*,0† | 74*,65*,70*,2 | 44*,32*,38*,2 | 51*,37*,44*,5 | 29,11†,20†,13* | 67*,22,45*,5 |
| *Trichotichnus fulgens* | 15†,31,24†,9* | 29,24,27,3 | 19,31,25,8 | 16†,29,22†,8 | 18†,24,21†,9 | 21,23,22,7 | 28,32,30,4 | 28,35,32,3 | 24,20,22,6 |

**Table S9.** Overlap statistics calculated for pairs of environmental and ground beetle variables measured at the rural site at the large spatial scale. Shown for each pair: *Oe*, the mean minimum Euclidean distance between each environmental candidate boundary element and the closest beetle candidate boundary element (m); *Ob*, the mean minimum Euclidean distance between each beetle candidate boundary element and the closest environmental candidate boundary element (m); *Oeb*, the overall mean minimum Euclidean distance between beetle and environmental candidate boundary elements (m); and *Os*, the number of beetle and environmental candidate boundary elements at the same locations. †Significantly low value (*p* < 0.10). *Significantly high value (*p* < 0.10).

| Beetle variable | Temperature | Humidity | Slope | Leaf litter depth | Forb cover | Bare ground cover |
| --- | --- | --- | --- | --- | --- | --- |
| Total species evenness | 70,90*,80,0 | 64*,56,60,0 | 33,37,35,2 | 43,41,42,0 | 73,90*,81*,0 | 42,29,35,1 |
| Generalist species abundance | 13†,17†,15†,4* | 33,28,31,2 | 46,50,48,1 | 46,55*,51,1 | 13†,17†,15†,4* | 53,33,43,2 |
| Generalist species richness | 22,37†,30†,2 | 26,32,29,2 | 23,40,31,2 | 37,39,38,1 | 26,40,33,1 | 29,28,28,2 |
| Generalist species evenness | 109*,100*,105*,0 | 89*,65*,77*,0 | 32,32,32,2 | 55,43,49,0 | 112*,100*,106*,0 | 76*,35,55*,1 |
| All species | 7†,8†,8†,5* | 20†,18†,19†,3* | 47,43,45,1 | 52,56*,54*,1 | 7†,8†,8†,5* | 45,30,37,2 |
| All species weighted | 7†,12†,9†,5* | 18†,18†,18†,4* | 39,37,38,2 | 44,55*,50,1 | 7†,12†,9†,5* | 51,33,42,2 |
| Generalist species | 7†,8†,8†,5* | 20†,18†,19†,3* | 47,43,45,1 | 52,56*,54*,1 | 7†,8†,8†,5* | 45,30,37,2 |
| *Anisodactylus dulcicollis* | 25,28†,26†,2 | 28,30,29,2 | 19,21†,20,3 | 33,26,30,3 | 21,24†,23†,3 | 56,44,50,0 |
| *Anisodactylus opaculus* | 16†,32,24,3 | 30,39,34,2 | 47,55,51,1 | 48,48,48,1 | 13†,29,21†,4* | 46,34,40,2 |
| *Anisodactylus rusticus* | 16†,24†,20†,3 | 20†,24†,22†,3 | 19,18†,19,3 | 33,25,29,3 | 19,24†,22†,3 | 46,37,42,1 |
| *Chlaenius prasinus* | 64*,69*,67*,0† | 46*,38†,42*,1† | 27*,27†,27†,2† | 42*,32†,37*,1† | 67*,69*,68*,0† | 49*,32†,40*,1† |
| *Galerita janus* | 31,52,42,2 | 37,49,43,2 | 18,22,20,2 | 43,27,35,2 | 33,52,43,2 | 67*,53*,60*,1 |
| *Lebia vittata* | 0,0†,0†,7 | 15*,7†,11†,5† | 59*,36†,48*,1† | 59*,56*,57*,0† | 4*,4†,4†,6† | 49*,22†,36*,3† |

**Table S10.** Overlap statistics calculated for pairs of environmental and ground beetle variables measured at the suburban site at the small spatial scale. Shown for each pair: *Oe*, the mean minimum Euclidean distance between each environmental candidate boundary element and the closest beetle candidate boundary element (m); *Ob*, the mean minimum Euclidean distance between each beetle candidate boundary element and the closest environmental candidate boundary element (m); *Oeb*, the overall mean minimum Euclidean distance between beetle and environmental candidate boundary elements (m); and *Os*, the number of beetle and environmental candidate boundary elements at the same locations. †Significantly low value (*p* < 0.10). *Significantly high value (*p* < 0.10).

| Beetle variable | Slope | Leaf litter depth | Forb cover | Grass cover | Creeping forb cover | Shrub cover | Moss cover | All environmental variables |
| --- | --- | --- | --- | --- | --- | --- | --- | --- |
| Total species evenness | 28,27,27,5 | 24†,26,25,2 | 23,28,25,5 | 24†,27,25,4 | 25,33,29,3 | 19†,19,19†,7* | 24†,29,26,9* | 29,31*,30,6 |
| Generalist species evenness | 17†,21,19†,7* | 24†,24,24,3 | 15†,22,19†,6 | 18†,20,19†,7* | 21†,29,25,4 | 20†,24,22†,7* | 19†,24,21†,8* | 18†,22,20†,7* |
| Open-habitat species | 36,20,28,8 | 54*,49*,51*,0† | 54*,30,42*,2 | 57*,40*,48*,6 | 70*,37,53*,3 | 57*,56*,56*,3 | 27,21,24,8 | 47*,28,37,7 |
| Generalist species weighted | 21,23,22,5 | 31,31*,31*,3† | 16,24,20,8 | 22,26,24,8 | 20,31,25,5 | 31,37*,34*,4 | 24,30,27,3 | 20,20,20,8 |
| *Amara aenea* | 36,25,30,6 | 50*,46*,48*,0† | 52*,29,41*,2 | 56*,39*,48*,6 | 69*,38,53*,3 | 55*,51*,53*,3 | 27,24,25,8 | 47*,32,40*,5 |
| *Anisodactylus dulcicollis* | 30,22,26,7 | 41*,34*,38*,4 | 37*,22,29,8 | 46*,30,38*,5 | 57*,24,40*,4 | 50*,45*,47*,2† | 32,24,28,7 | 39*,24,31,9 |
| *Dicaelus dilatatus dilatatus* | 44*,36,40*,3 | 21,14†,17†,7 | 24,16†,20,8 | 20,12†,16†,10 | 23,28,25,4 | 21,13†,17†,9 | 64*,44*,54*,1† | 43,33,38,3 |
| *Poecilus lucublandus lucublandus* | 62*,29,46*,4 | 40*,20,30,4 | 39,12†,26,10* | 32,14†,23,9 | 27,7†,17†,17* | 26,13†,20,9 | 77*,50*,64*,0† | 54*,21,38,8 |
| *Pterostichus sculptus* | 32,28,30,1† | 33,32*,32*,4 | 22,24,23,8 | 20,28,24,7 | 21,28,25,10* | 16†,25,21,7 | 27,36,32,5 | 28,25,26,7 |
| *Scarites subterraneus* | 30,17†,23,7 | 44*,33*,39*,4 | 30,28,29,4 | 40,46*,43*,0† | 30,36,33,3 | 46*,54*,50*,0† | 21,16†,19†,11* | 26,22,24,6 |

**Table S11.** Overlap statistics calculated for pairs of environmental and ground beetle variables measured at the suburban site at the large spatial scale. Shown for each pair: *Oe*, the mean minimum Euclidean distance between each environmental candidate boundary element and the closest beetle candidate boundary element (m); *Ob*, the mean minimum Euclidean distance between each beetle candidate boundary element and the closest environmental candidate boundary element (m); *Oeb*, the overall mean minimum Euclidean distance between beetle and environmental candidate boundary elements (m); and *Os*, the number of beetle and environmental candidate boundary elements at the same locations. †Significantly low value (*p* < 0.10). *Significantly high value (*p* < 0.10).

| Beetle variable | Microrelief | Leaf litter depth | Canopy cover | Vine cover |
| --- | --- | --- | --- | --- |
| Total abundance | 16†,14†,15†,4* | 43,29,36,2 | 37,29,33,2 | 71*,51,61*,1 |
| Forest species richness | 61,63,62,0 | 37,44,40,1 | 47,58,53,2 | 29,32,30,2 |
| Generalist species abundance | 16†,15†,15†,4 | 43,34,38,2 | 44,29,36,2 | 71*,48,59*,1 |
| All species | 16†,16†,16†,4* | 43,37,40,2 | 45,27,36,2 | 71*,42,57*,1 |
| All species weighted | 37,42,39,0 | 44,43,43,0 | 49,51,50,1 | 52,40,46,1 |
| Open-habitat species | 29,24,26,2 | 32,24,28,2 | 44,48,46,1 | 35,24,29,2 |
| Open-habitat species weighted | 55,47,51,0 | 64*,52,58*,0 | 39,45,42,2 | 65,34,50,1 |
| Generalist species | 16†,16†,16†,4* | 43,37,40,2 | 45,27,36,2 | 71*,42,57,1 |
| *Cyclotrachelus sigillatus* | 42,31†,37†,2 | 35,31,33,2 | 74*,67*,70*,0 | 46,42*,44*,0† |
| *Olisthopus parmatus* | 42,31†,37†,2 | 35,31,33,2 | 74*,67*,70*,0 | 46,42*,44*,0† |
| *Poecilus lucublandus lucublandus* | 92*,66,79*,0 | 62*,55*,58*,0 | 103*,79*,91*,0 | 42,32,37,1 |
| *Scarites subterraneus* | 16†,11†,13†,4* | 43,28,35,2 | 50,33,41,1 | 71*,42,57,1 |
| *Scarites quadriceps* | 16,11†,13†,4 | 43,28,35,2 | 50,33,41,1 | 71,42,57,1 |
| *Stenolophus rotundatus* | 38,36,37,1 | 72*,46,59*,0 | 29†,14†,21†,4* | 97*,74*,85*,0 |

**Table S12.** Overlap statistics calculated for pairs of environmental and ground beetle variables measured at the urban site at the small spatial scale. Shown for each pair: *Oe*, the mean minimum Euclidean distance between each environmental candidate boundary element and the closest beetle candidate boundary element (m); *Ob*, the mean minimum Euclidean distance between each beetle candidate boundary element and the closest environmental candidate boundary element (m); *Oeb*, the overall mean minimum Euclidean distance between beetle and environmental candidate boundary elements (m); and *Os*, the number of beetle and environmental candidate boundary elements at the same locations. †Significantly low value (*p* < 0.10). *Significantly high value (*p* < 0.10).

| Beetle variable | Temperature | Humidity | Slope | Leaf litter depth | Canopy cover | Forb cover | Grass cover | Shrub cover | Vine cover | Bare ground cover | Impervious surface cover | All environmental variables |
| --- | --- | --- | --- | --- | --- | --- | --- | --- | --- | --- | --- | --- |
| Total abundance | 19,36,28,8 | 17,28,23,10* | 33*,47,41,4 | 31,33,32,5 | 17,35,26,8 | 19,27,23,9 | 16,23,20†,9 | 27,39,33,8 | 40*,34,37*,6 | 17,21,19,6 | 13,25†,19†,10* | 16,19,17,10 |
| Total evenness | 25,45,35,4 | 29,33,31,4 | 24†,45,34,3 | 18†,23,20†,6* | 24,45,34,6 | 21†,41,30,6 | 21†,27,24,7 | 26,40,33,2 | 18†,17†,17†,7* | 18†,20,19†,8* | 22,39,30,7 | 26,24,25,7 |
| Forest species abundance | 65*,79*,72*,0† | 65*,63*,64*,0† | 44*,35,39,1 | 23,22,22,9 | 67*,84*,76*,0† | 61*,61*,61*,1 | 54*,63*,59*,0† | 34,15†,24,10* | 29,20,24,6 | 40*,35,37,4 | 50*,64*,57*,1 | 60*,43*,51*,0† |
| Forest species richness | 65*,79*,72*,0† | 65*,63*,64*,0† | 44*,35,39,1 | 23,22,22,9 | 67*,84*,76*,0† | 60*,61*,61*,1 | 54*,63*,59*,0† | 34,15†,24,10* | 29,20,24,6 | 40*,35,37,4 | 50*,64*,57*,1 | 60*,43*,51*,0† |
| Generalist species abundance | 25,50,38,5 | 22,37,30,8 | 30,50,40,4 | 32,31,31,6 | 22,51,37,5 | 22,40,31,6 | 19,34,27,7 | 23,42,33,7 | 38*,29,33,6 | 20,26,23,5 | 15,38,27,9 | 18,21,20,9 |
| Generalist species evenness | 19†,39,29,7* | 19†,25,22†,8* | 28,49,38,4 | 30,32,31,4 | 18†,41,29,7 | 16†,39,27,8* | 15†,23,19†,10* | 20†,34,27,7 | 27†,32,29,5 | 22,27,24,4 | 19,39,29,5 | 16†,21,19†,10* |
| Forest species | 65*,82*,74*,0† | 65*,64*,64*,0† | 44*,36,40,1 | 23,22,22,9 | 67*,87*,77*,0† | 61*,64*,62*,1 | 54*,63*,59*,0† | 34,15†,24,10* | 29,19,24,6 | 40*,33,36,4 | 50*,65*,58*,1 | 60*,43*,51*,0† |
| Open-habitat species | 27,34,31,5 | 29,23†,26,6 | 25,31,28,8 | 24,26,25,8 | 14†,18†,16†,9 | 30,38,34,6 | 23,20†,22†,8 | 28,31,30,4 | 29,22,25,8 | 16†,14†,15†,10* | 11†,14†,13†,10* | 22,20,21,7 |
| *Agonum punctiforme* | 15†,24†,20†,8 | 18,26,22,7 | 30,38,34,5 | 33,32,32,6 | 13†,17†,15†,11* | 21,16†,19†,11* | 14†,16†,15†,10* | 41*,35,38,6 | 47*,36*,42*,4 | 19,13†,16†,10* | 13†,16†,14†,10* | 20,22,21,6 |
| *Anisodactylus dulcicollis* | 16†,16†,16†,11* | 18,19†,19†,10* | 43*,42,42,5 | 46*,35,40*,3 | 12†,14†,13†,12* | 22,10†,16†,13* | 16†,11†,14†,11* | 49*,41,44*,7 | 62*,38*,49*,2 | 23,15†,19†,7 | 6†,8†,7†,15* | 19,13†,16†,13* |
| *Anisodactylus furvus* | 24,33†,29†,7 | 27,21†,24†,8 | 20,27†,23†,12 | 22,19†,21†,9 | 26,35†,31†,6 | 32,44,38,4 | 21,19†,20†,9 | 30,34,32,3 | 27,15†,21†,9 | 19,16†,17†,8 | 20,33†,26†,8 | 29,19†,24†,8 |
| *Chlaenius tricolor tricolor* | 18†,24†,21†,6 | 17†,17†,17†,7 | 32,61*,47,4 | 37,31,34,5 | 18,24†,21†,6 | 28,30,29,7 | 11†,12†,11†,12* | 46*,55*,51*,2 | 47*,32,39,5 | 18†,19†,19†,8 | 11†,24†,18†,9 | 16†,15†,16†,9* |
| *Harpalus longicollis* | 15†,13†,14†,11* | 17†,14†,15†,10* | 41*,53,47*,4 | 51*,50*,50*,1† | 14†,12†,13†,11* | 21,13†,17†,13* | 16†,13†,15†,11* | 53*,46,49*,8 | 66*,48*,57*,2 | 28,20,24,5 | 10†,13†,11†,12* | 19,12†,15†,12* |
| *Scarites subterraneus* | 16†,19†,18†,7 | 17,23†,20†,7 | 40*,40,40,3 | 40*,37,38*,4 | 12†,16†,14†,10* | 22,11†,16†,11* | 16†,15†,16†,8 | 47*,43,45*,3 | 56*,32,43*,2 | 20,12†,16†,10* | 9†,13†,11†,11* | 20,18†,19,8 |
| *Sphaeroderus stenostomus lecontei* | 80*,77*,78*,0† | 80*,66*,73*,0† | 42,21†,31,5 | 32,17†,24,8 | 87*,86*,86*,0† | 80*,57*,68*,1† | 74*,73*,73*,0† | 44,26,34,2 | 39,22,30,5 | 63*,50*,56*,0† | 72*,72*,72*,0† | 73*,41*,57*,1† |

**Table S13.** Overlap statistics calculated for pairs of environmental and ground beetle variables measured at the urban site at the large spatial scale. Shown for each pair: *Oe*, the mean minimum Euclidean distance between each environmental candidate boundary element and the closest beetle candidate boundary element (m); *Ob*, the mean minimum Euclidean distance between each beetle candidate boundary element and the closest environmental candidate boundary element (m); *Oeb*, the overall mean minimum Euclidean distance between beetle and environmental candidate boundary elements (m); and *Os*, the number of beetle and environmental candidate boundary elements at the same locations. †Significantly low value (*p* < 0.10). *Significantly high value (*p* < 0.10).

| Beetle variable | Humidity | Microrelief | Slope | Leaf litter depth | Bare ground cover |
| --- | --- | --- | --- | --- | --- |
| Generalist species richness | 27,21†,24,3 | 35,26,31,2 | 61,44,52,0 | 28,16†,22†,4* | 52,46,49,2 |
| *Amara familiaris* | 42,36,39,1 | 75*,68*,71*,0 | 56,36,46,2 | 41,28,34,2 | 28,20,24,3 |
| *Chlaenius tomentosus tomentosus* | 53*,32†,43*,2† | 92*,66*,79*,0† | 89*,71*,80*,0† | 43*,32†,38*,2† | 28*,17†,22†,3† |
| *Chlaenius tricolor tricolor* | 35,32,33,2 | 61,59,60,1 | 54,58*,56,1 | 24†,27,26†,2 | 15†,18†,17†,4* |
| *Harpalus pensylvanicus* | 34,29,32,2 | 47,45,46,1 | 37,30,34,2 | 29,18†,24†,3 | 42,33,37,2 |
| *Sphaeroderus stenostomus lecontei* | 55,61*,58,0 | 33,41,37,1 | 41,26,33,2 | 65,63*,64*,0 | 96*,95*,95*,0 |
